# Supplementary material for: Growth and Mineral Relations of Beta vulgaris var. cicla and Beta vulgaris ssp. maritima Cultivated Hydroponically with Diluted Seawater and Low Nitrogen Level in the Nutrient Solution
Source: MDPI journal article supplement (doi:10.3390/horticulturae8070638), 2022-07-14
Supplement: s1 [file s1]

**Table S1.** Reference intake for an average adult, as reported in the Commission Regulation (EU) No 1169/2011, and tolerable upper intake level (UIL), safe and adequate intake (SAI) or acceptable daily intake (ADI) of mineral elements and nitrate (NO<sub>3</sub>) set by the European Food Safety Authority\*.

| Element         | Reference intake | UIL, SAI or ADI | Reference  |
|-----------------|------------------|-----------------|------------|
|                 | mg/day           |                 |            |
| Ca              | 800              | 2500 (UIL)      | EFSA, 2012 |
| Cl              | 800              | 3100 (SAI)      | EFSA, 2019 |
| Cu              | 1                | 5 (UIL)         | EFSA, 2006 |
| Fe              | 14               | n.a.            |            |
| K               | 2000             | n.a.            |            |
| Mg              | 375              | 250 (UIL)       | EFSA, 2006 |
| Mn              | 2                | n.a.            |            |
| Na              | n.a.             | 2000 (SAI)      | EFSA, 2019 |
| P               | 700              | n.a.            |            |
| Zn              | 10               | 25 (UIL)        | EFSA, 2006 |
| NO <sub>3</sub> | n.a.             | 222(ADI*)       | EFSA, 2008 |

\* Acceptable Daily Intake (ADI), for a 60 kg adult.

**Table S2.** Results of 4-way ANOVA with salinity and N-NO<sub>3</sub> concentration of the nutrient solution, plant species and cut as variables.

|                                     | Yield                 | Leaf<br>DW/F<br>W | Leaf<br>area                   | Leaf<br>succule<br>nce | NO <sub>3</sub>           | N-org  | N-<br>NO <sub>3</sub> | P       | K             | Ca     | Mg     | Cl     | Na     | Cu     | Mn     | Fe     | Zn     |
|-------------------------------------|-----------------------|-------------------|--------------------------------|------------------------|---------------------------|--------|-----------------------|---------|---------------|--------|--------|--------|--------|--------|--------|--------|--------|
|                                     | kg FW m <sup>-2</sup> | %                 | m <sup>2</sup> m <sup>-2</sup> | kg m <sup>-2</sup>     | mg kg <sup>-1</sup><br>FW |        |                       |         |               |        |        |        |        |        |        |        |        |
| Source                              |                       |                   |                                |                        |                           |        |                       | P-value |               |        |        |        |        |        |        |        |        |
| Species                             | <.0001                | <.0001            | 0.4636                         | 0.0018                 | <.0001                    | <.0001 | <.0001                | 0.4925  | 0.0279        | 0.0160 | 0.0030 | <.0001 | <.0001 | 0.1442 | 0.0005 | 0.5086 | 0.2267 |
| IO                                  | <.0001                | <.0001            | <.0001                         | 0.0349                 | <.0001                    | 0.0512 | 0.9877                | 0.4328  | <.0001        | <.0001 | 0.0006 | <.0001 | <.0001 | 0.0004 | <.0001 | 0.3862 | 0.0390 |
| Species*IO                          | 0.2938                | 0.5685            | 0.3485                         | 0.1327                 | 0.3612                    | 0.0204 | 0.8336                | 0.0225  | 0.6214        | 0.1568 | 0.6818 | 0.0416 | 0.1943 | 10.000 | 0.0048 | 0.0602 | 0.9218 |
| NO <sub>3</sub>                     | <.0001                | <.0001            | <.0001                         | 0.5739                 | <.0001                    | <.0001 | <.0001                | 0.1800  | <.0001        | 0.7134 | <.0001 | <.0001 | <.0001 | 0.5238 | 0.0021 | 0.7691 | 0.0531 |
| Species*NO <sub>3</sub>             | 0.7267                | 0.0625            | 0.0663                         | 0.2720                 | 0.0195                    | 0.2903 | 0.9080                | 0.2611  | 0.7236        | 0.3479 | 0.1824 | 0.2813 | 0.0138 | 0.2080 | 0.1418 | 0.9262 | 0.1370 |
| IO*NO <sub>3</sub>                  | 0.0030                | 0.0052            | 0.0616                         | 0.2923                 | <.0001                    | 0.7962 | 0.0001                | 0.9532  | 0.9501        | 0.3936 | 0.3629 | 0.0468 | 0.4865 | 0.6701 | 0.7161 | 0.6215 | 0.3308 |
| Species*IO*NO <sub>3</sub>          | 0.8685                | 0.7578            | 0.3546                         | 0.4178                 | 0.0490                    | 0.0004 | 0.0008                | 0.2621  | 0.0322        | 0.1938 | 0.0794 | 0.8644 | 0.0171 | 0.1442 | <.0001 | 0.4884 | 0.0041 |
| Cut                                 | <.0001                | <.0001            | <.0001                         | <.0001                 | 0.0289                    | <.0001 | <.0001                | 0.0846  | 0.0541        | 0.0117 | <.0001 | 0.0004 | <.0001 | 0.0464 | 0.1055 | 0.0007 | 0.0177 |
| Species*Cut                         | 0.0043                | 0.0066            | <.0001                         | 0.0440                 | 0.2232                    | 0.0568 | <.0001                | <.0001  | 0.1177        | 0.0057 | 0.0742 | 0.4269 | 0.0014 | <.0001 | 0.0923 | 0.1007 | 0.0005 |
| salinity*Cut                        | 0.1261                | 0.1177            | 0.4924                         | 0.0130                 | 0.5947                    | 0.0047 | 0.0424                | 0.2166  | 0.8387        | 0.5004 | 0.0512 | 0.2750 | 0.0334 | 0.1620 | 0.3774 | 0.4360 | 0.0755 |
| Species*IO*Cut                      | 0.7120                | 0.3969            | 0.1104                         | 0.7921                 | 0.7273                    | <.0001 | 0.1301                | 0.0399  | 0.0762        | 0.1509 | 0.0062 | 0.1465 | 0.1192 | 0.4309 | 0.1994 | 0.1587 | 0.3006 |
| NO <sub>3</sub> *Cut                | <.0001                | 0.0872            | <.0001                         | 0.7056                 | <.0001                    | <.0001 | <.0001                | 0.0159  | 0.0025        | 0.1998 | 0.1052 | 0.4110 | 0.4905 | 0.0993 | 0.4954 | 0.9678 | 0.2632 |
| Species*NO <sub>3</sub> *Cut        | 0.4285                | 0.4328            | 0.0005                         | 0.0527                 | <.0001                    | 0.7645 | <.0001                | 0.2958  | 0.2831        | 0.7238 | 0.4989 | 0.2075 | 0.0301 | 0.7853 | 0.2050 | 0.1914 | 0.1267 |
| IO*NO <sub>3</sub> *Cut             | 0.4768                | 0.2180            | 0.0008                         | 0.0167                 | 0.1163                    | 0.0067 | 0.0076                | 0.6033  | 0.6491        | 0.8225 | 0.3173 | 0.1770 | 0.5152 | 0.0157 | 0.7782 | 0.7523 | 0.1930 |
| Species*IO*NO <sub>3</sub> *<br>Cut | 0.3900                | 0.3599            | 0.0837                         | 0.1050                 | 0.2457                    | 0.2142 | <b>0.0364</b>         | 0.2967  | <b>0.0135</b> | 0.2272 | 0.3007 | 0.6896 | 0.0396 | 0.6553 | 0.3897 | 0.6533 | 0.3161 |

**Table S3.** Root concentration of nitrogen (N), phosphorus (P), potassium (K), calcium (Ca), magnesium (Mg), sodium (Na), and chloride (Cl) in **Swiss chard and sea beet** plants grown hydroponically with different concentrations of the sea salt Instant Ocean (IO; 0 and 10 g L<sup>-1</sup>) and nitrate (N-NO<sub>3</sub><sup>-</sup>; 1 and 10 mM) in the nutrient solution. The K/Na molar ratio is also shown.

| Plant species                              | IO<br>(g L <sup>-1</sup> ) | NO <sub>3</sub><br>(mM) | N     | P       | K        | Na      | Cl       | K/Na molar<br>ratio |
|--------------------------------------------|----------------------------|-------------------------|-------|---------|----------|---------|----------|---------------------|
| (g kg <sup>-1</sup> DW)                    |                            |                         |       |         |          |         |          |                     |
| Swiss chard                                | 0                          | 10                      | 11.73 | 17.13   | 38.62    | 12.33   | 59.80    | 3.13                |
|                                            |                            | 1                       | 18.67 | 7.33    | 41.99    | 10.92   | 61.94    | 4.56                |
|                                            | 10                         | 10                      | 14.17 | 6.93    | 30.04    | 26.83   | 101.33   | 1.12                |
|                                            |                            | 1                       | 19.95 | 6.56    | 45.32    | 46.95   | 120.52   | 1.13                |
| Sea beet                                   | 0                          | 10                      | 13.02 | 13.14   | 39.89    | 14.51   | 54.37    | 2.75                |
|                                            |                            | 1                       | 19.92 | 6.97    | 45.39    | 11.94   | 66.70    | 3.80                |
|                                            | 10                         | 10                      | 14.13 | 5.18    | 40.79    | 32.21   | 92.64    | 1.27                |
|                                            |                            | 1                       | 18.75 | 5.92    | 59.61    | 59.92   | 102.61   | 0.99                |
| MEAN EFFECTS                               |                            |                         |       |         |          |         |          |                     |
| Swiss chard                                |                            |                         | 16.13 | 9.49    | 38.99    | 24.26   | 85.90    | 2.48                |
| Sea beet                                   |                            |                         | 16.46 | 7.80    | 46.42    | 29.65   | 79.08    | 2.20                |
|                                            | 0                          |                         | 15.84 | 11.14 a | 41.47    | 12.43 b | 60.70 b  | 3.56 a              |
|                                            | 10                         |                         | 16.75 | 6.15 b  | 43.94    | 41.48 a | 104.27 a | 1.13 b              |
|                                            |                            | 10                      | 19.32 | 6.69    | 37.33 b  | 21.47   | 77.03    | 2.07                |
|                                            |                            | 1                       | 13.26 | 10.60   | 48.08 a  | 32.44   | 87.94    | 2.62                |
| Swiss chard                                | 0                          |                         | 15.20 | 12.23   | 40.30 b  | 11.62 b | 60.87 b  | 3.85 a              |
|                                            | 10                         |                         | 17.06 | 6.75    | 37.68 b  | 36.89 a | 110.92 a | 1.12 b              |
| Sea beet                                   | 0                          |                         | 16.47 | 10.06   | 42.64 b  | 13.23 b | 60.53 b  | 3.27 a              |
|                                            | 10                         |                         | 16.44 | 5.55    | 50.20 a  | 46.07 a | 97.62 a  | 1.13 b              |
| Swiss chard                                |                            | 10                      | 19.31 | 6.94    | 34.33 c  | 19.58   | 80.56    | 2.13                |
|                                            |                            | 1                       | 12.95 | 12.03   | 43.65 b  | 28.94   | 91.23    | 2.84                |
| Sea beet                                   |                            | 10                      | 19.34 | 6.45    | 40.34 bc | 23.36   | 73.50    | 2.01                |
|                                            |                            | 1                       | 13.57 | 9.16    | 52.50 a  | 35.93   | 84.65    | 2.40                |
|                                            | 0                          | 10                      | 19.30 | 7.15    | 39.25 b  | 13.42 c | 57.08 b  | 2.94 b              |
|                                            |                            | 1                       | 19.35 | 6.24    | 43.69 ab | 11.43 c | 64.32 b  | 4.18 a              |
|                                            | 10                         | 10                      | 12.38 | 15.13   | 35.41 b  | 29.52 b | 96.98 a  | 1.20 c              |
|                                            |                            | 1                       | 14.15 | 6.06    | 52.46 a  | 53.44 a | 111.56 a | 1.06 c              |
| ANOVA                                      |                            |                         |       |         |          |         |          |                     |
| Plant species (PS)                         |                            |                         | ns    | ns      | ns       | ns      | ns       | ns                  |
| IO concentration                           |                            |                         | ns    | *       | ns       | ***     | ***      | ***                 |
| NO <sub>3</sub> <sup>-</sup> concentration |                            |                         | ns    | ns      | **       | ns      | ns       | ns                  |
| PS x IO                                    |                            |                         | ns    | ns      | ns       | **      | ***      | **                  |
| PS x NO <sub>3</sub> <sup>-</sup>          |                            |                         | ns    | ns      | **       | ns      | ns       | ns                  |
| IO x NO <sub>3</sub> <sup>-</sup>          |                            |                         | ns    | ns      | **       | ***     | ***      | ***                 |
| PS x IO x NO <sub>3</sub> <sup>-</sup>     |                            |                         | ns    | ns      | ns       | ns      | ns       | ns                  |

Means (n = 3) keyed by the same letter are not statistically different for P = 0.05 after Duncan's test. Significance level: \*\*\* P ≤ 0.001; \*\* P ≤ 0.01; \* P ≤ 0.05; ns = not significant.

**Table S4.** Total root content of nitrogen (N), phosphorus (P), potassium (K), calcium (Ca), magnesium (Mg), sodium (Na), and chloride (Cl) in **Swiss chard and sea beet** plants grown hydroponically with different concentrations of the sea salt Instant Ocean (IO; 0 and 10 g L<sup>-1</sup>) and nitrate (N-NO<sub>3</sub><sup>-</sup>; 1 and 10 mM) in the nutrient solution. The K/Na molar ratio is also shown.

| Plant species                              | IO<br>(g L <sup>-1</sup> ) | NO <sub>3</sub><br>(mM) | N       | P       | K       | Na     | Cl      | K/Na molar<br>ratio |
|--------------------------------------------|----------------------------|-------------------------|---------|---------|---------|--------|---------|---------------------|
| (g m <sup>-2</sup> )                       |                            |                         |         |         |         |        |         |                     |
| Swiss chard                                | 0                          | 10                      | 2.66 ab | 0.53 bc | 2.80 bc | 0.90   | 4.30 cd | 1.84 ab             |
|                                            |                            | 1                       | 2.49 ab | 1.82 a  | 4.49 a  | 1.14   | 6.55 ab | 2.68 a              |
|                                            | 10                         | 10                      | 2.04 bc | 0.33 cd | 1.52 c  | 1.36   | 5.10 bc | 0.66 b              |
|                                            |                            | 1                       | 1.70 bc | 0.40 bc | 2.71 bc | 3.08   | 7.12 a  | 0.66 b              |
| Sea beet                                   | 0                          | 10                      | 3.31 a  | 0.57 b  | 3.30 ab | 1.20   | 4.45 c  | 1.62 ab             |
|                                            |                            | 1                       | 0.95 c  | 0.48 bc | 1.65 c  | 0.43   | 2.43 d  | 2.24 a              |
|                                            | 10                         | 10                      | 1.96 bc | 0.32 cd | 2.13 bc | 1.65   | 4.78 bc | 0.75 b              |
|                                            |                            | 1                       | 0.91 c  | 0.17 d  | 1.92 c  | 1.92   | 3.29 cd | 0.58 b              |
| MEAN EFFECTS                               |                            |                         |         |         |         |        |         |                     |
| Swiss chard                                |                            |                         | 2.22    | 0.77    | 2.88    | 1.62   | 5.77 a  | 1.46                |
| Sea beet                                   |                            |                         | 1.78    | 0.39    | 2.25    | 1.30   | 3.73 b  | 1.30                |
| 0                                          |                            |                         | 2.35    | 0.85 a  | 3.06    | 0.92 b | 4.43    | 2.09 a              |
| 10                                         |                            |                         | 1.65    | 0.30 b  | 2.07    | 2.00 a | 5.07    | 0.66 b              |
|                                            |                            | 10                      | 2.49 a  | 0.44    | 2.44    | 1.28   | 4.66    | 1.22                |
|                                            |                            | 1                       | 1.51 b  | 0.72    | 2.69    | 1.65   | 4.85    | 1.54                |
| Swiss chard                                | 0                          |                         | 2.57    | 1.17 a  | 3.65    | 1.02   | 5.43 ab | 2.26 a              |
|                                            | 10                         |                         | 1.87    | 0.37 b  | 2.11    | 2.22   | 6.11 a  | 0.66 b              |
| Sea beet                                   | 0                          |                         | 2.13    | 0.53 b  | 2.47    | 0.82   | 3.44 b  | 1.93 a              |
|                                            | 10                         |                         | 1.43    | 0.24 b  | 2.02    | 1.79   | 4.03 ab | 0.67 b              |
| Swiss chard                                |                            | 10                      | 2.35 a  | 0.43    | 2.16 b  | 1.13   | 4.70 b  | 1.25                |
|                                            |                            | 1                       | 2.09 a  | 1.11    | 3.60 a  | 2.11   | 6.84 a  | 1.67                |
| Sea beet                                   |                            | 10                      | 2.64 a  | 0.45    | 2.72 ab | 1.43   | 4.61 b  | 1.18                |
|                                            |                            | 1                       | 0.93 b  | 0.32    | 1.78 b  | 1.18   | 2.86 c  | 1.41                |
|                                            | 0                          | 10                      | 2.99 a  | 0.55 ab | 3.05    | 1.05   | 4.38    | 1.73 a              |
|                                            |                            | 1                       | 1.72 b  | 1.15 a  | 3.07    | 0.79   | 4.49    | 2.46 a              |
|                                            | 10                         | 10                      | 2.00 ab | 0.33 b  | 1.83    | 1.51   | 4.94    | 0.70 b              |
|                                            |                            | 1                       | 1.30 b  | 0.28 b  | 2.31    | 2.50   | 5.20    | 0.62 b              |
| ANOVA                                      |                            |                         |         |         |         |        |         |                     |
| Plant species (PS)                         |                            |                         | ns      | ns      | ns      | ns     | **      | ns                  |
| IO concentration                           |                            |                         | ns      | *       | ns      | *      | ns      | ***                 |
| NO <sub>3</sub> <sup>-</sup> concentration |                            |                         | *       | ns      | ns      | ns     | ns      | ns                  |
| PS x IO                                    |                            |                         | ns      | *       | ns      | ns     | *       | **                  |
| PS x NO <sub>3</sub> <sup>-</sup>          |                            |                         | *       | ns      | *       | ns     | ***     | ns                  |
| IO x NO <sub>3</sub> <sup>-</sup>          |                            |                         | *       | *       | ns      | ns     | ns      | ***                 |
| PS x IO x NO <sub>3</sub> <sup>-</sup>     |                            |                         | *       | ***     | **      | ns     | **      | *                   |

Means (n = 3) keyed by the same letter are not statistically different for P = 0.05 after Duncan's test. Significance level: \*\*\* P ≤ 0.001; \*\* P ≤ 0.01; \* P ≤ 0.05; ns = not significant.

**Table S5.** Leaf production of some vegetables species grown hydroponically under greenhouse.

| Species                                           | Cultivation system | Nutrient solution salinity (EC, dS m <sup>-1</sup> ) | Plant density (plants m <sup>-2</sup> ) | Growing season | Growing cycle (days) | Number of cuts | Yield (kg m <sup>-2</sup> ) | Reference               |
|---------------------------------------------------|--------------------|------------------------------------------------------|-----------------------------------------|----------------|----------------------|----------------|-----------------------------|-------------------------|
| <i>Beta vulgaris</i> L.                           | NFT                | 2.0 – 2.4                                            | 10 - 40                                 | Summer-Autumn  | 114                  | 8 -15 -22      | 7.5 - 22                    | Maboko & du Plooy, 2013 |
| Swiss chard<br>( <i>Beta vulgaris</i> var. cicla) | Flood and drain    | 2.0                                                  | n.a.                                    | Autumn         | 42                   | 3              | 250 – 600 (g/plant)         | Hlophe et al., 2019     |
| Spinach<br>( <i>Spinacia oleracea</i> L.)         | Floating system    | n.a.                                                 | n.a.                                    | Winter         | 54                   | 2              | 2.2 – 2.4                   | D'Imperio et al., 2019  |
| Swiss chard<br>( <i>Beta vulgaris</i> var. cicla) | Floating system    | n.a.                                                 | n.a.                                    | Winter         | 71                   | 2              | 2.2 – 2.9                   |                         |

n.a., not available

**Table S6.** Health risk index (HRI, %) associated with the consumption of 100 g FW of leaves of Swiss chard and sea beet plants grown hydroponically with different concentrations of the sea salt Instant Ocean (IO; 0 and 10 g L<sup>-1</sup>) and nitrate (N-NO<sub>3</sub>; 1 and 10 mM) in the nutrient solution (see Table 2 for abbreviations). The leaves were harvested trice during the experiment (see Table 1 for more information in the experiment and the test for the calculation of HRI).

| Element         | Cut                 | Swiss chard |        |          |         | Sea beet |        |          |         |
|-----------------|---------------------|-------------|--------|----------|---------|----------|--------|----------|---------|
|                 |                     | 0IO-10N     | 0IO-1N | 10IO-10N | 10IO-1N | 0IO-10N  | 0IO-1N | 10IO-10N | 10IO-1N |
| Ca              | 1 <sup>st</sup> cut | 1.1         | 1.5    | 1.0      | 1.1     | 1.9      | 2.4    | 1.5      | 2.2     |
|                 | 2 <sup>nd</sup> cut | 1.3         | 1.8    | 1.4      | 1.3     | 1.9      | 1.8    | 1.5      | 1.6     |
|                 | 3 <sup>rd</sup> cut | 1.5         | 1.8    | 1.3      | 1.3     | 1.7      | 2.0    | 1.8      | 1.9     |
| Mg              | 1 <sup>st</sup> cut | 10.0        | 10.0   | 15.5     | 9.4     | 16.5     | 14.6   | 23.4     | 18.4    |
|                 | 2 <sup>nd</sup> cut | 15.6        | 15.1   | 31.4     | 21.4    | 25.2     | 17.9   | 31.2     | 24.4    |
|                 | 3 <sup>rd</sup> cut | 17.7        | 15.1   | 28.6     | 20.0    | 23.0     | 19.8   | 35.1     | 26.9    |
| Cl              | 1 <sup>st</sup> cut | 4.0         | 5.4    | 7.6      | 9.5     | 4.8      | 7.0    | 6.5      | 8.3     |
|                 | 2 <sup>nd</sup> cut | 4.8         | 7.6    | 8.1      | 10.3    | 4.4      | 4.8    | 7.0      | 8.5     |
|                 | 3 <sup>rd</sup> cut | 5.5         | 7.9    | 10.3     | 13.8    | 6.6      | 7.3    | 10.5     | 11.6    |
| Na              | 1 <sup>st</sup> cut | 5.2         | 6.3    | 12.0     | 10.3    | 13.0     | 25.1   | 26.5     | 36.6    |
|                 | 2 <sup>nd</sup> cut | 7.4         | 10.2   | 17.8     | 26.7    | 12.8     | 23.7   | 31.3     | 32.3    |
|                 | 3 <sup>rd</sup> cut | 9.9         | 13.4   | 23.1     | 28.4    | 17.9     | 24.0   | 43.3     | 43.3    |
| Cu              | 1 <sup>st</sup> cut | 1.0         | 1.4    | 1.4      | 1.5     | 2.4      | 3.2    | 2.6      | 2.7     |
|                 | 2 <sup>nd</sup> cut | 1.9         | 2.7    | 2.5      | 1.8     | 2.3      | 2.4    | 2.1      | 2.3     |
|                 | 3 <sup>rd</sup> cut | 2.2         | 2.7    | 2.6      | 3.2     | 1.6      | 1.6    | 1.3      | 2.8     |
| Zn              | 1 <sup>st</sup> cut | 1.0         | 1.5    | 1.4      | 1.4     | 1.5      | 2.6    | 1.8      | 3.0     |
|                 | 2 <sup>nd</sup> cut | 1.4         | 2.4    | 2.5      | 2.3     | 2.0      | 1.7    | 2.0      | 2.7     |
|                 | 3 <sup>rd</sup> cut | 1.7         | 2.6    | 2.7      | 2.3     | 2.2      | 2.6    | 2.2      | 2.1     |
| NO <sub>3</sub> | 1 <sup>st</sup> cut | 76.5        | 17.5   | 107.7    | 23.9    | 148.3    | 30.7   | 219.8    | 22.5    |
|                 | 2 <sup>nd</sup> cut | 60.3        | 8.9    | 87.8     | 10.2    | 127.5    | 62.8   | 160.2    | 69.7    |
|                 | 3 <sup>rd</sup> cut | 80.9        | 11.8   | 123.7    | 9.1     | 106.1    | 100.3  | 162.3    | 84.0    |

**Table S7.** Percentage of the reference intake for an average adult (as reported in the Commission Regulation (EU) No 1169/2011) associated with the consumption of 100 g of fresh leaves of **Swiss chard** or **sea beet** plants grown hydroponically with different concentrations of the sea salt Instant Ocean (IO; 0 and 10 g L<sup>-1</sup>) and nitrate (N-NO<sub>3</sub>; 1 and 10 mM) in the nutrient solution (see Table 2 for abbreviations). The leaves were harvested trice during the experiment (see Table 1 for more information in the experiment and the text for the calculation of EDI).

| Element | Cut                 | Swiss chard |        |          |         | Sea beet |        |          |         |
|---------|---------------------|-------------|--------|----------|---------|----------|--------|----------|---------|
|         |                     | 0IO-10N     | 0IO-1N | 10IO-10N | 10IO-1N | 0IO-10N  | 0IO-1N | 10IO-10N | 10IO-1N |
| P       | 1 <sup>st</sup> cut | 0.9         | 0.9    | 1.4      | 1.4     | 0.9      | 1.0    | 1.0      | 1.0     |
|         | 2 <sup>nd</sup> cut | 0.8         | 1.0    | 1.8      | 1.4     | 1.2      | 1.2    | 1.3      | 1.3     |
|         | 3 <sup>rd</sup> cut | 0.6         | 1.1    | 0.9      | 1.1     | 1.5      | 1.5    | 1.7      | 2.0     |
| K       | 1 <sup>st</sup> cut | 15.7        | 16.7   | 22.7     | 14.2    | 32.6     | 20.3   | 25.3     | 23.2    |
|         | 2 <sup>nd</sup> cut | 19.7        | 21.9   | 26.7     | 15.4    | 25.7     | 21.5   | 22.9     | 20.1    |
|         | 3 <sup>rd</sup> cut | 17.5        | 20.6   | 16.0     | 16.2    | 23.1     | 27.9   | 34.8     | 29.3    |
| Ca      | 1 <sup>st</sup> cut | 3.4         | 4.8    | 3.1      | 3.4     | 6.0      | 7.5    | 4.7      | 6.8     |
|         | 2 <sup>nd</sup> cut | 4.1         | 5.6    | 4.3      | 4.1     | 6.0      | 5.6    | 4.6      | 4.8     |
|         | 3 <sup>rd</sup> cut | 4.7         | 5.5    | 4.0      | 4.2     | 5.2      | 6.2    | 5.6      | 5.8     |
| Mg      | 1 <sup>st</sup> cut | 6.7         | 6.6    | 10.3     | 6.3     | 11.0     | 9.8    | 15.6     | 12.3    |
|         | 2 <sup>nd</sup> cut | 10.4        | 10.1   | 20.9     | 14.3    | 16.8     | 12.0   | 20.8     | 16.3    |
|         | 3 <sup>rd</sup> cut | 11.8        | 10.1   | 19.1     | 13.3    | 15.3     | 13.2   | 23.4     | 17.9    |
| Cl      | 1 <sup>st</sup> cut | 15.3        | 20.7   | 29.4     | 36.8    | 18.4     | 27.0   | 25.2     | 32.1    |
|         | 2 <sup>nd</sup> cut | 18.4        | 29.4   | 31.2     | 39.7    | 17.1     | 18.7   | 27.3     | 33.1    |
|         | 3 <sup>rd</sup> cut | 21.4        | 30.5   | 40.0     | 53.5    | 25.5     | 28.3   | 40.8     | 44.8    |
| Cu      | 1 <sup>st</sup> cut | 5.0         | 7.2    | 7.1      | 7.3     | 11.9     | 16.2   | 12.8     | 13.5    |
|         | 2 <sup>nd</sup> cut | 9.5         | 13.6   | 12.6     | 9.2     | 11.6     | 12.1   | 10.7     | 11.3    |
|         | 3 <sup>rd</sup> cut | 11.0        | 13.3   | 13.0     | 16.0    | 8.2      | 8.1    | 6.5      | 13.9    |
| Mn      | 1 <sup>st</sup> cut | 26.5        | 48.3   | 28.8     | 27.2    | 56.2     | 71.9   | 50.2     | 77.2    |
|         | 2 <sup>nd</sup> cut | 32.6        | 85.3   | 39.8     | 36.5    | 74.7     | 59.4   | 49.3     | 65.3    |
|         | 3 <sup>rd</sup> cut | 37.5        | 77.6   | 33.9     | 39.0    | 61.2     | 58.3   | 54.9     | 88.7    |
| Fe      | 1 <sup>st</sup> cut | 4.3         | 5.5    | 5.3      | 6.4     | 8.4      | 9.6    | 8.4      | 10.6    |
|         | 2 <sup>nd</sup> cut | 9.8         | 16.3   | 11.0     | 14.0    | 10.6     | 11.1   | 13.2     | 10.8    |
|         | 3 <sup>rd</sup> cut | 9.1         | 10.0   | 10.3     | 7.4     | 6.5      | 6.1    | 11.7     | 18.7    |
| Zn      | 1 <sup>st</sup> cut | 2.6         | 3.8    | 3.5      | 3.4     | 3.7      | 6.5    | 4.5      | 7.4     |
|         | 2 <sup>nd</sup> cut | 3.5         | 6.0    | 6.2      | 5.7     | 5.1      | 4.3    | 5.1      | 6.8     |
|         | 3 <sup>rd</sup> cut | 4.3         | 6.5    | 6.8      | 5.9     | 5.4      | 6.4    | 5.5      | 5.2     |

## References

- D'Imperio, M., Montesano, F. F., Renna, M., Parente, A., Logrieco, A. F., & Serio, F. (2019). Hydroponic production of reduced-potassium swiss chard and spinach: A feasible agronomic approach to tailoring vegetables for chronic kidney disease patients. *Agronomy*, 9(10), 1–12. <https://doi.org/10.3390/agronomy9100627>
- EFSA. (2006). Tolerable upper intake level on vitamins and minerals. In *Scientific Committee on Food* (Vol. 33, Issue 6).
- EFSA. (2008). Nitrate in vegetables - Scientific Opinion of the Panel on Contaminants in the Food chain. *EFSA Journal*, 6(6). <https://doi.org/10.2903/j.efsa.2008.689>
- EFSA. (2012). Scientific Opinion on the Tolerable Upper Intake Level of calcium. *EFSA Journal*, 10(7), 1–44. <https://doi.org/10.2903/j.efsa.2012.2814>
- EFSA. (2019). Dietary reference values for chloride. *EFSA Journal*, 17(9). <https://doi.org/10.2903/j.efsa.2019.5779>
- Hlophe, P. A., Nxumalo, K. A., Oseni, T. O., Masarirambi, M. T., Wahome, P. K., & Shongwe, V. D. (2019). Effects of different media on the growth and yield of Swiss chard (*Beta vulgaris* var. cicla) grown in hydroponics. *Horticulture International Journal*, 3(3). <https://doi.org/10.15406/hij.2019.03.00122>
- Maboko, M. M., & du Plooy, C. P. (2013). Effect of plant spacing and harvesting frequency on the yield of Swiss chard cultivars (*Beta vulgaris* L.) in a closed hydroponic system. *African Journal of Agricultural Research*, 8(10), 936–942. <https://doi.org/10.5897/AJAR12.2032>
